# Supplementary material for: HLA-G Alleles Impact the Perinatal Father–Child HPV Transmission
Source: MDPI journal article supplement (doi:10.3390/cimb45070366), 2023-07-12
Supplement: s1 [file s1]

## HLA-G alleles impact the perinatal father-child HPV transmission

Nelli T. Suominen, Michel Roger, Marie-Claude Faucher, Kari J. Syrjänen, Seija E. Grénman, Stina M. Syrjänen, Karolina Louvanto

Corresponding author: Karolina Louvanto

**Table S1** Association of Human leukocyte antigen G (HLA-G) allele sharing with postpartum Human papillomavirus (HPV) prevalence among 134 father-child pairs of the Finnish Family HPV study. The father-child pairs with both parties being negative for these specific alleles served as a reference in high resolution HLA-allele groups. In low resolution HLA-G allele groups discordant father-child pairs served as a reference.

| HLA-G allele concordance <sup>a</sup> | allele sharing | HPV: father semen/child oral <sup>b</sup><br>OR (95 % CI) |                   |                   | HPV: father urethra/child oral <sup>b</sup><br>OR (95 % CI) |                   |                   | HPV: father oral/child oral <sup>b</sup><br>OR (95 % CI) |                   |                   |
|---------------------------------------|----------------|-----------------------------------------------------------|-------------------|-------------------|-------------------------------------------------------------|-------------------|-------------------|----------------------------------------------------------|-------------------|-------------------|
|                                       |                | any                                                       | LR                | HR                | any                                                         | LR                | HR                | any                                                      | LR                | HR                |
| <b>*01:01:01</b>                      | 0              | 1.00                                                      | 1.00              | 1.00              | 1.00                                                        | 1.00              | 1.00              | 1.00                                                     | 1.00              | 1.00              |
|                                       | 1              | NA                                                        | NA                | NA                | NA                                                          | NA                | NA                | NA                                                       | NA                | NA                |
|                                       | ≥2             | NA                                                        | NA                | NA                | NA                                                          | NA                | NA                | NA                                                       | NA                | NA                |
| <b>*01:01:02</b>                      | 0              | 1.00                                                      | 1.00              | 1.00              | 1.00                                                        | 1.00              | 1.00              | 1.00                                                     | 1.00              | 1.00              |
|                                       | 1              | 1.88 (0.81-4.34)                                          | 1.89 (0.62-5.74)  | 1.22 (0.53-2.81)  | 1.81 (0.77-4.26)                                            | 0.96 (0.31-3.02)  | 1.55 (0.67-3.58)  | 2.33 (0.98-5.53)                                         | 1.92 (0.60-6.16)  | 1.64 (0.71-3.80)  |
|                                       | ≥2             | 2.32 (0.94-5.68)                                          | 2.39 (0.80-7.08)  | 1.06 (0.44-2.54)  | 1.54 (0.64-3.69)                                            | 0.68 (0.20-2.28)  | 1.27 (0.52-3.09)  | 1.14 (0.48-2.70)                                         | 1.23 (0.34-4.47)  | 0.76 (0.31-1.88)  |
| <b>*01:01:03</b>                      | 0              | 1.00                                                      | 1.00              | 1.00              | 1.00                                                        | 1.00              | 1.00              | 1.00                                                     | 1.00              | 1.00              |
|                                       | 1              | 0.52 (0.14-1.92)                                          | 0.69 (0.40-7.14)  | 0.70 (0.19-2.62)  | 1.31 (0.35-4.87)                                            | NA                | 1.85 (0.50-6.92)  | 0.40 (0.10-1.62)                                         | NA                | 0.59 (0.14-2.38)  |
|                                       | ≥2             | 0.15 (0.02-1.36)                                          | 0.79 (0.09-7.15)  | 0.21 (0.02-1.86)  | 0.87 (0.17-4.50)                                            | 0.86 (0.10-7.73)  | 1.24 (0.24-6.38)  | 1.87 (0.33-10.59)                                        | 1.07 (0.12-9.75)  | 2.73 (0.48-15.53) |
| <b>*01:01:14</b>                      | 0              | 1.00                                                      | 1.00              | 1.00              | 1.00                                                        | 1.00              | 1.00              | 1.00                                                     | 1.00              | 1.00              |
|                                       | 1              | NA                                                        | NA                | NA                | NA                                                          | NA                | NA                | NA                                                       | NA                | NA                |
|                                       | ≥2             | 0.43 (0.04-4.92)                                          | NA                | 0.58 (0.05-6.52)  | 1.76 (0.16-19.95)                                           | 5.05 (0.30-84.13) | 0.57 (0.05-6.42)  | 0.48 (0.04-5.48)                                         | NA                | 0.66 (0.06-7.51)  |
| <b>*01:03:01</b>                      | 0              | 1.00                                                      | 1.00              | 1.00              | 1.00                                                        | 1.00              | 1.00              | 1.00                                                     | 1.00              | 1.00              |
|                                       | 1              | 1.32 (0.21-8.17)                                          | NA                | 1.71 (0.28-10.60) | 1.34 (0.22-8.29)                                            | NA                | 1.80 (0.29-11.16) | 1.48 (0.24-9.14)                                         | NA                | 2.05 (0.33-12.70) |
|                                       | ≥2             | 0.88 (0.12-6.44)                                          | 1.83 (0.16-21.04) | 0.38 (0.04-3.76)  | 2.68 (0.27-26.45)                                           | 1.49 (0.15-15.06) | 1.20 (0.16-8.80)  | 0.98 (0.13-7.21)                                         | 1.92 (0.19-19.57) | 0.46 (0.05-4.50)  |
| <b>*01:04:01</b>                      | 0              | 1.00                                                      | 1.00              | 1.00              | 1.00                                                        | 1.00              | 1.00              | 1.00                                                     | 1.00              | 1.00              |
|                                       | 1              | 0.40 (0.15-1.08)                                          | 0.63 (0.17-2.35)  | 0.44 (0.16-1.23)  | 0.43 (0.16-1.18)                                            | 0.48 (0.10-2.24)  | 0.62 (0.23-1.69)  | 0.65 (0.25-1.73)                                         | 0.28 (0.04-2.29)  | 0.98 (0.37-2.60)  |
|                                       | ≥2             | 2.14 (0.54-8.55)                                          | NA                | 2.95 (0.74-11.78) | 2.14 (0.54-8.55)                                            | 0.51 (0.06-4.30)  | 2.02 (0.55-7.33)  | 2.61 (0.66-10.42)                                        | 0.85 (0.10-7.58)  | 2.56 (0.70-9.31)  |
| <b>*01:06</b>                         | 0              | 1.00                                                      | 1.00              | 1.00              | 1.00                                                        | 1.00              | 1.00              | 1.00                                                     | 1.00              | 1.00              |
|                                       | 1              | 0.43 (0.08-2.41)                                          | 0.76 (0.08-6.88)  | 0.22 (0.03-1.94)  | 0.40 (0.07-2.29)                                            | 2.53 (0.43-14.79) | 0.22 (0.02-1.91)  | 0.48 (0.08-2.70)                                         | 1.24 (0.14-11.29) | 0.26 (0.03-2.25)  |
|                                       | ≥2             | 1.70 (0.15-19.26)                                         | 1.91 (0.17-22.03) | 2.21 (0.19-24.98) | 0.40 (0.04-4.58)                                            | 2.53 (0.22-29.29) | 0.54 (0.05-6.15)  | 1.90 (0.17-21.56)                                        | 3.09 (0.26-36.13) | 0.64 (0.06-7.23)  |
| Low resolution                        |                |                                                           |                   |                   |                                                             |                   |                   |                                                          |                   |                   |
| <b>*01:01+</b>                        | 1              | 1.00                                                      | 1.00              | 1.00              | 1.00                                                        | 1.00              | 1.00              | 1.00                                                     | 1.00              | 1.00              |
|                                       | 2              | 8.25 (0.65-104.19)                                        | NA                | 6.00 (0.49-73.45) | 2.00 (0.21-18.69)                                           | NA                | 1.14 (0.13-10.39) | 8.25 (0.65-104.19)                                       | NA                | 3.43 (0.29-40.95) |
|                                       | 3              | 2.63 (0.24-28.20)                                         | NA                | 1.50 (0.14-16.32) | 0.71 (0.09-5.73)                                            | NA                | 0.56 (0.07-4.57)  | 2.80 (0.26-30.18)                                        | NA                | 2.12 (0.20-22.90) |
|                                       | 4              | 3.46 (0.35-34.64)                                         | NA                | 2.86 (0.29-28.62) | 1.27 (0.17-9.45)                                            | NA                | 0.93 (0.13-6.92)  | 2.86 (0.29-28.62)                                        | NA                | 2.14 (0.21-21.47) |

<sup>a</sup>Only those alleles that were ≥3 % prevalent were included in the analyses.

<sup>b</sup>Father's semen, urethral or oral HPV prevalence at baseline and/or child's oral postpartum HPV prevalence.

0 = no shared alleles; 1 = discordant for the allele; ≥2 = at least 2 shared alleles i.e. both heterozygous or homozygous for the allele; 2 = 2 shared alleles, 3 = 3 shared alleles, 4 = 4 shared alleles

NA=not applicable.
